# Supplementary material for: Neto1 Is a Novel CUB-Domain NMDA Receptor–Interacting Protein Required for Synaptic Plasticity and Learning
Source: PLOS journal article supplement (doi:10.1371/journal.pbio.1000041), 2009-02-20

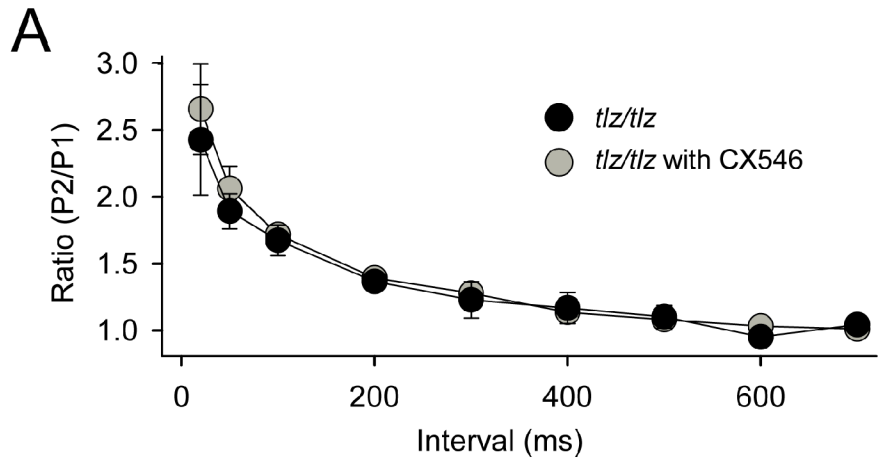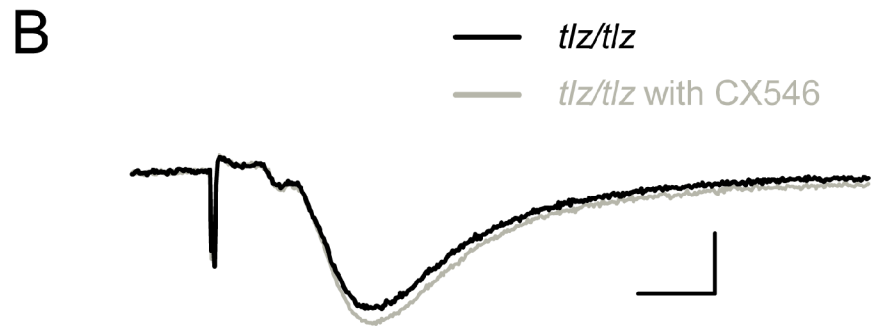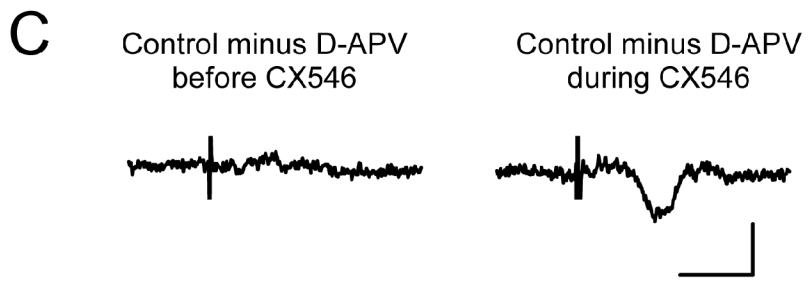

Supplement: S10 (10.1371/journal.pbio.1000041.s010) [file journal.pbio.1000041.s010]
